# Supplementary material for: Interactive Effect of Melatonin and UV-C on Phenylpropanoid Metabolite Production and Antioxidant Potential in Callus Cultures of Purple Basil (Ocimum basilicum L. var purpurascens)
Source: MDPI journal article supplement (doi:10.3390/molecules25051072), 2020-02-27
Supplement: s1 [file s1]

## Supplementary Data;

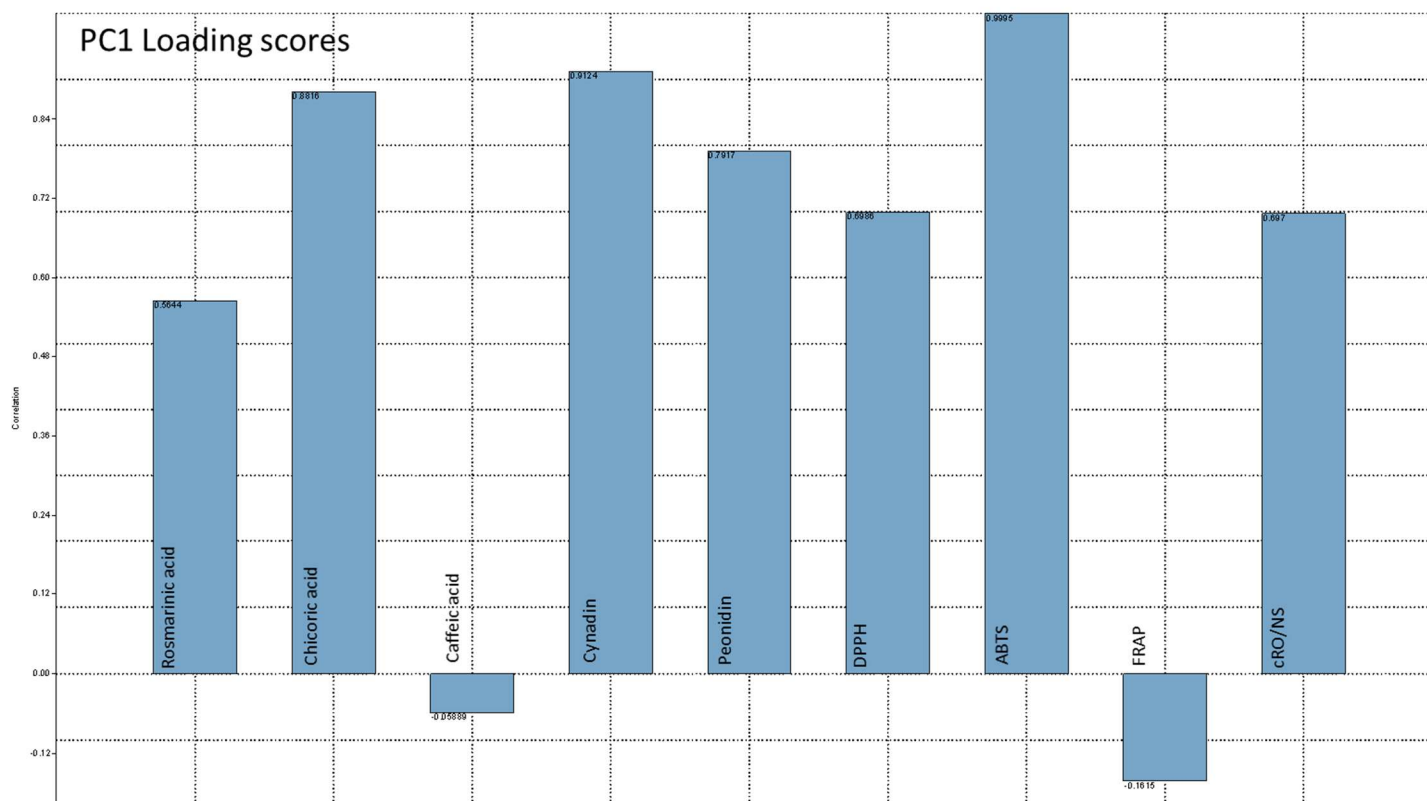

**S1:** Loading scores of the first axis of the principal component analysis showing the impact of melatonin (MEL), UV-C (UV) and their combination on the phytochemical and antioxidant capacities of purple basil calli extracts

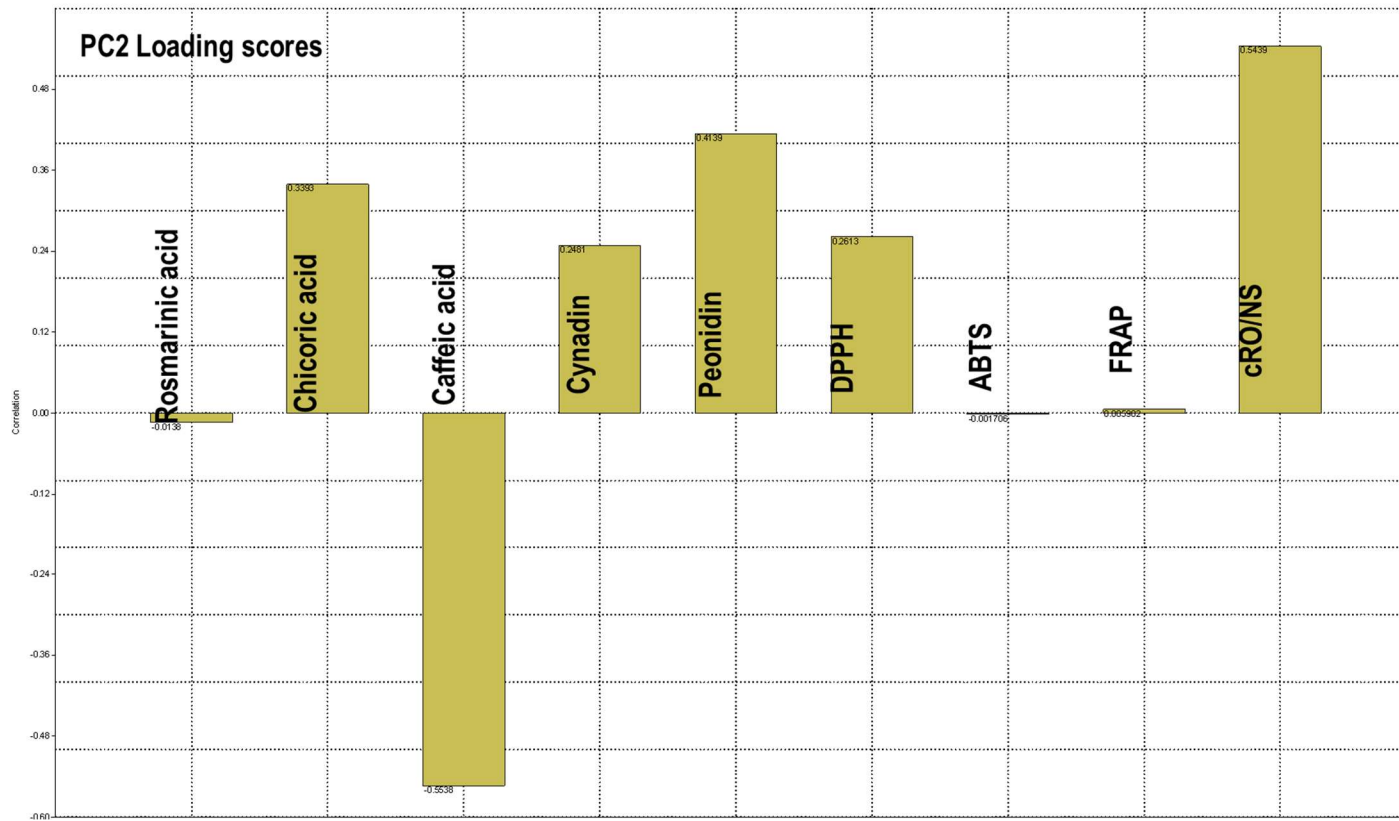

**S2:** Loading scores of the second axis of the principal component analysis showing the impact of melatonin (MEL), UV-C (UV) and their combination on the phytochemical and antioxidant capacities of purple basil calli extracts.
